# Supplementary material for: Advanced Protective Films Based on Binary ZnO-NiO@polyaniline Nanocomposite for Acidic Chloride Steel Corrosion: An Integrated Study of Theoretical and Practical Investigations
Source: MDPI journal article supplement (doi:10.3390/polym14214734), 2022-11-04
Supplement: s1 [file s1]

Supplementary Materials

# Advanced Protective Films Based on Binary ZnO-NiO@polyaniline Nanocomposite for Acidic Chloride Steel Corrosion: An Integrated Study of Theoretical and Practical Investigations

May Ahmed Al-Masoud <sup>1</sup>, Mai M. Khalaf <sup>1,2</sup>, Fakiha El-Taib Heakal <sup>3,\*</sup>, Mohamed Gouda <sup>1,\*</sup>, Ibrahim M. A. Mohamed <sup>2</sup>, Kamal Shalabi <sup>4,5</sup> and Hany M. Abd El-Lateef <sup>1,2,\*</sup>

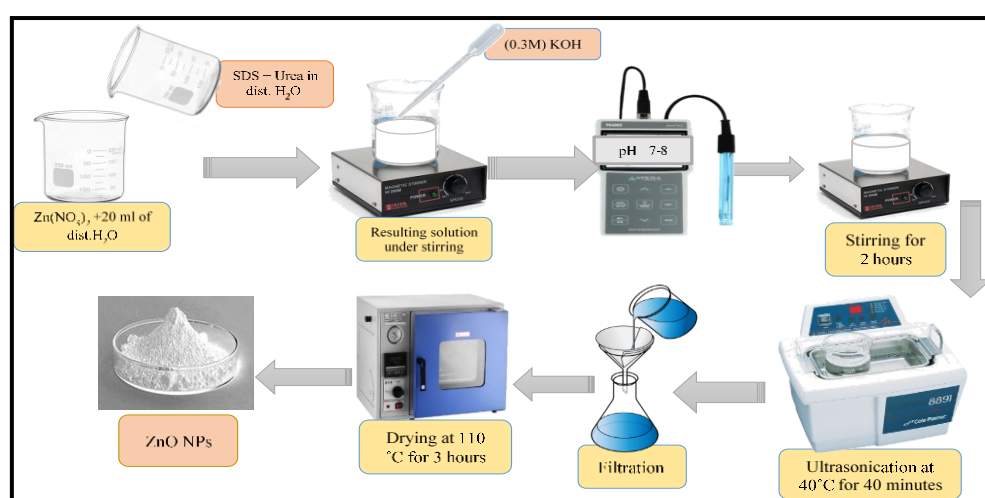

**Figure S1.** A representative scheme of the fabrication route of ZnO nanoparticles.

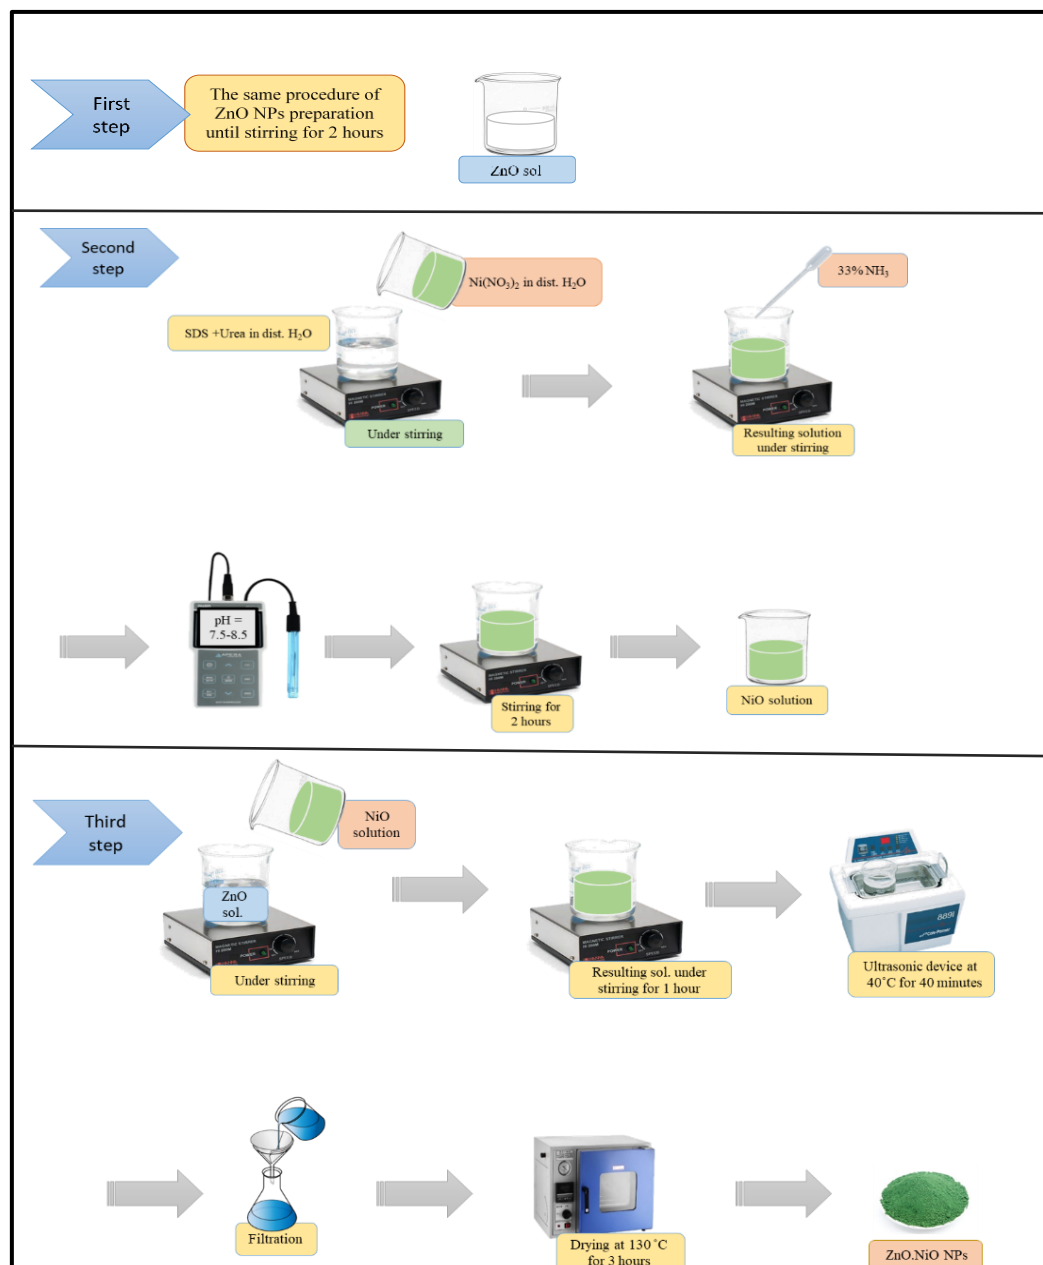

**Figure S2.** A representative scheme of the fabrication route of ZnO-NiO nanoparticles.

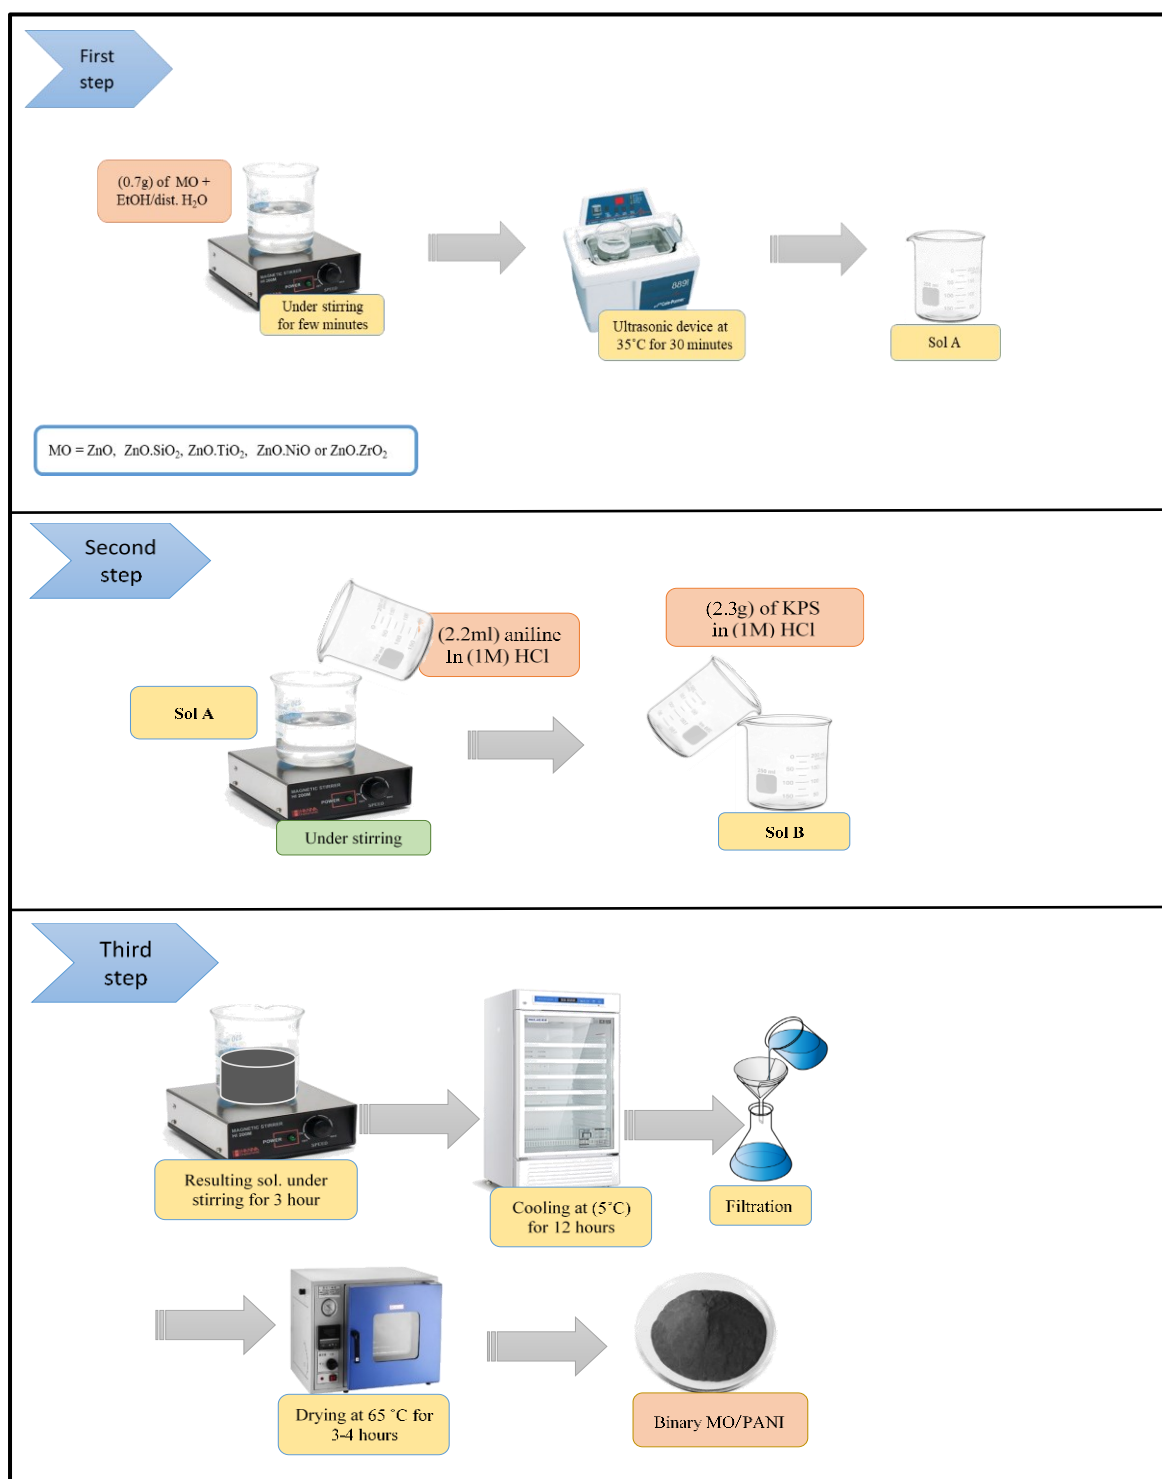

**Figure S3.** A representative scheme of the fabrication route of binary MO/PANI nanocomposites by oxidation in situ-polymerization.

**Table S1.** The evaluated Fukui indices.

| Atom No | PANE     |        |        |        |        |        | Mulliken Charges |
|---------|----------|--------|--------|--------|--------|--------|------------------|
|         | f+       | ω+     | σ+     | f-     | ω-     | σ-     |                  |
| C1      | 0.027    | 0.101  | 0.018  | 0.005  | 0.019  | 0.003  | -0.087           |
| C2      | 0.026    | 0.098  | 0.017  | 0.005  | 0.019  | 0.003  | -0.043           |
| C3      | 0.030    | 0.113  | 0.020  | 0.006  | 0.023  | 0.004  | -0.045           |
| C4      | 0.024    | 0.090  | 0.016  | 0.005  | 0.019  | 0.003  | -0.042           |
| C5      | 0.030    | 0.113  | 0.020  | 0.006  | 0.023  | 0.004  | -0.091           |
| C6      | 0.019    | 0.071  | 0.012  | 0.001  | 0.004  | 0.001  | 0.203            |
| N7      | -0.004   | -0.015 | -0.003 | -0.001 | -0.004 | -0.001 | -0.244           |
| C8      | 0.023    | 0.086  | 0.015  | 0.025  | 0.094  | 0.016  | 0.169            |
| C9      | 0.032    | 0.120  | 0.021  | 0.014  | 0.053  | 0.009  | -0.083           |
| C10     | 0.034    | 0.128  | 0.022  | 0.026  | 0.098  | 0.017  | -0.101           |
| C11     | 0.027    | 0.101  | 0.018  | 0.011  | 0.041  | 0.007  | 0.222            |
| C12     | 0.028    | 0.105  | 0.018  | 0.022  | 0.083  | 0.014  | -0.130           |
| C13     | 0.033    | 0.124  | 0.022  | 0.015  | 0.056  | 0.010  | -0.086           |
| N14     | 0.008    | 0.030  | 0.005  | 0.046  | 0.173  | 0.030  | -0.270           |
| C15     | 0.023    | 0.086  | 0.015  | 0.014  | 0.053  | 0.009  | 0.223            |
| C16     | 0.027    | 0.101  | 0.018  | 0.026  | 0.098  | 0.017  | -0.102           |
| C17     | 0.030    | 0.113  | 0.020  | 0.016  | 0.060  | 0.010  | -0.082           |
| C18     | 0.022    | 0.083  | 0.014  | 0.019  | 0.071  | 0.012  | 0.169            |
| C19     | 0.025    | 0.094  | 0.016  | 0.016  | 0.060  | 0.010  | -0.079           |
| C20     | 0.028    | 0.105  | 0.018  | 0.026  | 0.098  | 0.017  | -0.135           |
| N21     | -0.002   | -0.008 | -0.001 | -0.002 | -0.008 | -0.001 | -0.242           |
| C22     | 0.005    | 0.019  | 0.003  | 0.041  | 0.154  | 0.027  | 0.148            |
| C23     | 0.012    | 0.045  | 0.008  | 0.019  | 0.071  | 0.012  | -0.079           |
| C24     | 0.018    | 0.068  | 0.012  | 0.048  | 0.180  | 0.031  | -0.124           |
| C25     | 0.007    | 0.026  | 0.005  | 0.018  | 0.068  | 0.012  | 0.231            |
| C26     | 0.017    | 0.064  | 0.011  | 0.044  | 0.165  | 0.029  | -0.122           |
| C27     | 0.013    | 0.049  | 0.008  | 0.021  | 0.079  | 0.014  | -0.081           |
| N28     | 0.02     | 0.075  | 0.013  | 0.098  | 0.368  | 0.064  | -0.352           |
| Atom no | ZnO@PANE |        |        |        |        |        | Mulliken Charges |
|         | f+       | ω+     | σ+     | f-     | ω-     | σ-     |                  |
| C1      | 0.024    | 0.103  | 0.019  | 0.005  | 0.021  | 0.004  | -0.096           |
| C2      | 0.023    | 0.098  | 0.018  | 0.005  | 0.021  | 0.004  | -0.067           |
| C3      | 0.027    | 0.116  | 0.022  | 0.006  | 0.026  | 0.005  | -0.069           |
| C4      | 0.020    | 0.086  | 0.016  | 0.004  | 0.017  | 0.003  | -0.066           |
| C5      | 0.028    | 0.120  | 0.022  | 0.006  | 0.026  | 0.005  | -0.092           |
| C6      | 0.017    | 0.073  | 0.014  | 0.002  | 0.009  | 0.002  | 0.162            |
| N7      | -0.011   | -0.047 | -0.009 | -0.009 | -0.039 | -0.007 | -0.301           |
| C8      | 0.017    | 0.073  | 0.014  | 0.015  | 0.064  | 0.012  | 0.114            |
| C9      | 0.031    | 0.133  | 0.025  | 0.013  | 0.056  | 0.010  | -0.082           |
| C10     | 0.028    | 0.120  | 0.022  | 0.020  | 0.086  | 0.016  | -0.114           |
| C11     | 0.025    | 0.107  | 0.020  | 0.011  | 0.047  | 0.009  | 0.184            |

|      |        |        |        |        |        |        |        |
|------|--------|--------|--------|--------|--------|--------|--------|
| C12  | 0.030  | 0.128  | 0.024  | 0.022  | 0.094  | 0.018  | -0.159 |
| C13  | 0.027  | 0.116  | 0.022  | 0.011  | 0.047  | 0.009  | -0.086 |
| N14  | 0.007  | 0.030  | 0.006  | 0.031  | 0.133  | 0.025  | -0.237 |
| C15  | 0.024  | 0.103  | 0.019  | 0.011  | 0.047  | 0.009  | 0.177  |
| C16  | 0.029  | 0.124  | 0.023  | 0.019  | 0.081  | 0.015  | -0.112 |
| C17  | 0.030  | 0.128  | 0.024  | 0.013  | 0.056  | 0.010  | -0.080 |
| C18  | 0.023  | 0.098  | 0.018  | 0.017  | 0.073  | 0.014  | 0.128  |
| C19  | 0.027  | 0.116  | 0.022  | 0.011  | 0.047  | 0.009  | -0.094 |
| C20  | 0.028  | 0.120  | 0.022  | 0.020  | 0.086  | 0.016  | -0.155 |
| N21  | -0.005 | -0.021 | -0.004 | -0.004 | -0.017 | -0.003 | -0.298 |
| C22  | 0.003  | 0.013  | 0.002  | 0.017  | 0.073  | 0.014  | 0.114  |
| C23  | 0.014  | 0.060  | 0.011  | 0.010  | 0.043  | 0.008  | -0.093 |
| C24  | 0.014  | 0.060  | 0.011  | 0.021  | 0.090  | 0.017  | -0.120 |
| C25  | 0.008  | 0.034  | 0.006  | 0.011  | 0.047  | 0.009  | 0.148  |
| C26  | 0.015  | 0.064  | 0.012  | 0.021  | 0.090  | 0.017  | -0.121 |
| C27  | 0.013  | 0.056  | 0.010  | 0.011  | 0.047  | 0.009  | -0.084 |
| N28  | 0.013  | 0.056  | 0.010  | 0.044  | 0.188  | 0.035  | -0.368 |
| Zn29 | 0.044  | 0.188  | 0.035  | 0.199  | 0.851  | 0.160  | -0.015 |
| Zn30 | 0.037  | 0.158  | 0.030  | 0.136  | 0.582  | 0.109  | 0.015  |
| O31  | 0.001  | 0.004  | 0.001  | 0.010  | 0.043  | 0.008  | -0.550 |
| O32  | 0.001  | 0.004  | 0.001  | 0.006  | 0.026  | 0.005  | -0.555 |

| Atom<br>no | ZnNiO@PANE |        |        |        |        |        | Mulliken<br>Charges |
|------------|------------|--------|--------|--------|--------|--------|---------------------|
|            | f+         | ω+     | σ+     | f-     | ω-     | σ-     |                     |
| C1         | 0.072      | 0.457  | 0.077  | 0.064  | 0.406  | 0.068  | -0.091              |
| C2         | 0.072      | 0.457  | 0.077  | 0.064  | 0.406  | 0.068  | -0.062              |
| C3         | 0.100      | 0.635  | 0.107  | 0.088  | 0.559  | 0.094  | -0.074              |
| C4         | 0.072      | 0.457  | 0.077  | 0.064  | 0.406  | 0.068  | -0.062              |
| C5         | 0.088      | 0.559  | 0.094  | 0.072  | 0.457  | 0.077  | -0.090              |
| C6         | 0.032      | 0.203  | 0.034  | 0.024  | 0.152  | 0.026  | 0.177               |
| N7         | -0.040     | -0.254 | -0.043 | -0.032 | -0.203 | -0.034 | -0.579              |
| C8         | 0.132      | 0.838  | 0.141  | 0.120  | 0.762  | 0.128  | 0.191               |
| C9         | 0.048      | 0.305  | 0.051  | 0.040  | 0.254  | 0.043  | -0.085              |
| C10        | 0.155      | 0.986  | 0.166  | 0.144  | 0.914  | 0.154  | -0.090              |
| C11        | 0.088      | 0.559  | 0.094  | 0.080  | 0.508  | 0.086  | 0.177               |
| C12        | 0.133      | 0.843  | 0.142  | 0.120  | 0.762  | 0.128  | -0.122              |
| C13        | 0.088      | 0.559  | 0.094  | 0.080  | 0.508  | 0.086  | -0.068              |
| N14        | 0.224      | 1.422  | 0.240  | 0.240  | 1.524  | 0.257  | -0.171              |
| C15        | 0.112      | 0.711  | 0.120  | 0.104  | 0.660  | 0.111  | 0.191               |
| C16        | 0.154      | 0.978  | 0.165  | 0.152  | 0.965  | 0.163  | -0.074              |
| C17        | 0.088      | 0.559  | 0.094  | 0.080  | 0.508  | 0.086  | -0.042              |

|      |        |        |        |        |        |        |        |
|------|--------|--------|--------|--------|--------|--------|--------|
| C18  | 0.048  | 0.305  | 0.051  | 0.040  | 0.254  | 0.043  | 0.085  |
| C19  | 0.080  | 0.508  | 0.086  | 0.072  | 0.457  | 0.077  | -0.056 |
| C20  | 0.146  | 0.927  | 0.156  | 0.136  | 0.864  | 0.146  | -0.120 |
| N21  | -0.016 | -0.102 | -0.017 | -0.008 | -0.051 | -0.009 | -0.408 |
| C22  | 0.216  | 1.372  | 0.231  | 0.208  | 1.321  | 0.223  | 0.204  |
| C23  | 0.112  | 0.711  | 0.120  | 0.120  | 0.762  | 0.128  | -0.067 |
| C24  | 0.216  | 1.372  | 0.231  | 0.208  | 1.321  | 0.223  | -0.093 |
| C25  | 0.132  | 0.838  | 0.141  | 0.120  | 0.762  | 0.128  | 0.174  |
| C26  | 0.224  | 1.422  | 0.240  | 0.216  | 1.372  | 0.231  | -0.095 |
| C27  | 0.056  | 0.356  | 0.060  | 0.064  | 0.406  | 0.068  | -0.102 |
| N28  | 0.368  | 2.337  | 0.394  | 0.400  | 2.540  | 0.428  | -0.239 |
| Zn29 | 0.640  | 4.064  | 0.685  | 0.680  | 4.318  | 0.728  | 0.873  |
| Ni30 | 0.760  | 4.826  | 0.813  | 0.792  | 5.029  | 0.847  | 0.585  |
| O31  | 0.656  | 4.166  | 0.702  | 0.680  | 4.318  | 0.728  | -0.770 |
| O32  | 0.656  | 4.166  | 0.702  | 0.688  | 4.369  | 0.736  | -0.644 |
